# Supplementary material
Source: PubMed Central journal article supplement (PMC4108538)
Supplement: NIHMS600880-supplement-1.pdf [file NIHMS600880-supplement-1.pdf]

|                                                      | Acute SIV-Infected (7-14DPI) (n=7) |                |                |                |                |                |                | Non-SIV-infected with Diarrhea (Colitis) (n=6) |                |                |                |                |                | Uninfected Controls (n=4) |              |               |                |
|------------------------------------------------------|------------------------------------|----------------|----------------|----------------|----------------|----------------|----------------|------------------------------------------------|----------------|----------------|----------------|----------------|----------------|---------------------------|--------------|---------------|----------------|
|                                                      | HI52                               | HI58           | HI63           | M992           | IA85           | AV91           | HT44           | JM89                                           | IL72           | EH96           | JD55           | JD48           | FR72           | FF15                      | FT23         | EL66          | HT22           |
| <b>miR-190b</b>                                      | 22.7<br>22.5                       | 22.62<br>22.46 | 21.92<br>21.81 | 22.87<br>22.75 | 20.8<br>20.67  | 21.9<br>22.03  | 23.07<br>22.87 | 23.9<br>23.9                                   | 23.98<br>24.08 | 24.26<br>24.05 | 24.05<br>23.63 | 24.43<br>24.58 | 24.61<br>24.45 | 24.16<br>24.13            | 24.7<br>24.9 | 24.49<br>24.3 | 23.89<br>23.86 |
| <b>Mean C<sub>T</sub></b>                            | 22.6                               | 22.54          | 21.86          | 22.81          | 20.73          | 21.96          | 22.97          | 23.9                                           | 24.03          | 24.15          | 23.84          | 24.5           | 24.53          | 24.15                     | 24.8         | 24.39         | 23.88          |
| <b>STDEV</b>                                         | 0.136                              | 0.116          | 0.077          | 0.088          | 0.094          | 0.09           | 0.143          | 0.03                                           | 0.073          | 0.151          | 0.293          | 0.105          | 0.112          | 0.026                     | 0.14         | 0.134         | 0.024          |
| <b>RNU48</b>                                         | 15.32<br>14.52                     | 14.78<br>14.58 | 15.23<br>15.53 | 14.79<br>14.77 | 13.75<br>13.62 | 14.19<br>14.32 | 15.03<br>15.08 | 15<br>14.6                                     | 15.44<br>15    | 15.3<br>14.88  | 14.79<br>14.34 | 15.1<br>14.99  | 14.89<br>14.4  | 15.14<br>15.23            | 15<br>15     | 15.4<br>15.05 | 14.17<br>14.09 |
| <b>Mean C<sub>T</sub></b>                            | 14.92                              | 14.68          | 15.38          | 14.78          | 13.69          | 14.26          | 15.05          | 14.8                                           | 15.22          | 15.09          | 14.57          | 15.05          | 14.64          | 15.19                     | 15           | 15.22         | 14.13          |
| <b>STDEV</b>                                         | 0.563                              | 0.142          | 0.21           | 0.014          | 0.091          | 0.087          | 0.033          | 0.31                                           | 0.313          | 0.294          | 0.318          | 0.079          | 0.349          | 0.065                     | 0.02         | 0.248         | 0.059          |
| <b>DC<sub>T</sub></b>                                | 7.677                              | 7.865          | 6.48           | 8.03           | 7.047          | 7.706          | 7.92           | 9.12                                           | 8.806          | 9.063          | 9.27           | 9.457          | 9.886          | 8.961                     | 9.74         | 9.17          | 9.748          |
| <b>DDC<sub>T</sub></b>                               | -2.07                              | -1.88          | -3.268         | -1.72          | -2.7           | -2.04          | -1.83          | -0.63                                          | -0.94          | -0.68          | -0.48          | -0.29          | 0.138          | -0.79                     | -0.01        | -0.58         | 0              |
| <b>2<sup>-ΔΔC<sub>T</sub></sup></b><br>(Fold Change) | 4.201                              | 3.689          | 9.633          | 3.29           | 6.502          | 4.117          | 3.551          | 1.54                                           | 1.922          | 1.607          | 1.393          | 1.224          | 0.909          | 1.726                     | 1            | 1.493         | 1              |

|                                     | Acute SIV (n=7) | Colitis (n=6) | Controls (n=4) |
|-------------------------------------|-----------------|---------------|----------------|
| <b>Avg 190b C<sub>T</sub></b>       | 22.21           | 24.16         | 24.295         |
| <b>Avg U48 C<sub>T</sub></b>        | 14.68           | 14.89         | 14.889         |
| <b>DC<sub>T</sub></b>               | 7.532           | 9.267         | 9.4055         |
| <b>DDC<sub>T</sub></b>              | -1.87           | 0.138         |                |
| <b>2<sup>-ΔΔC<sub>T</sub></sup></b> | 3.664           | 0.909         |                |

**Supplemental table 1.** miR-190b raw C<sub>T</sub> values and fold change in acutely SIV-infected, Non-SIV-infected macaques with diarrhea and colitis and uninfected control macaques.

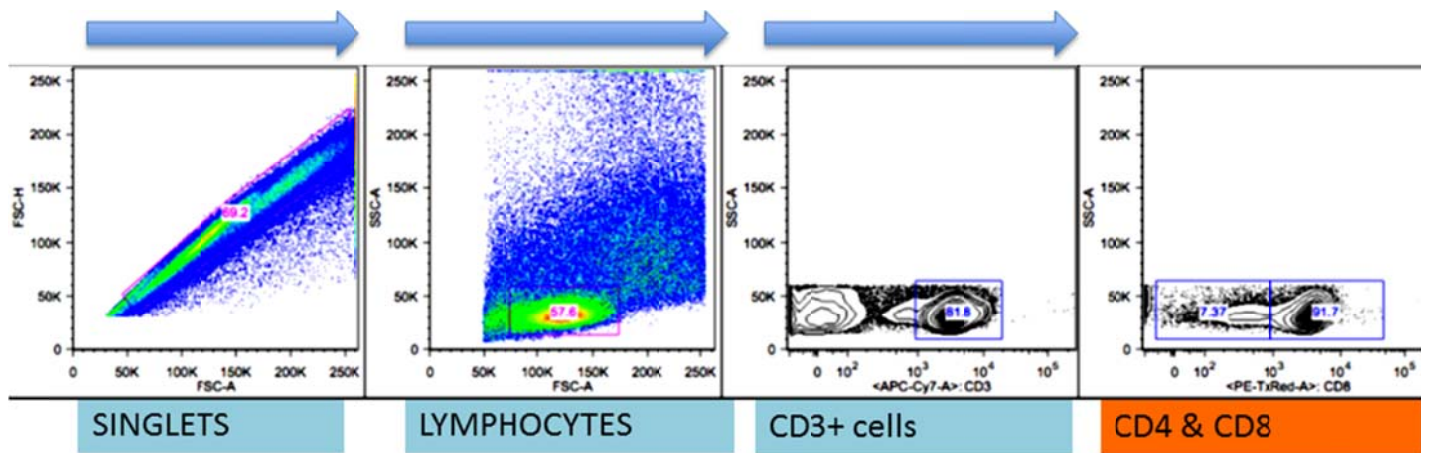

**Supplemental figure 1.** FACS plot showing gating strategy used for LPL analysis. 69.2% singlets, 57.6% lymphocytes, 82% CD3<sup>+</sup> lymphocytes, 7% CD4<sup>+</sup> T cells, 92% CD8<sup>+</sup> T cells.

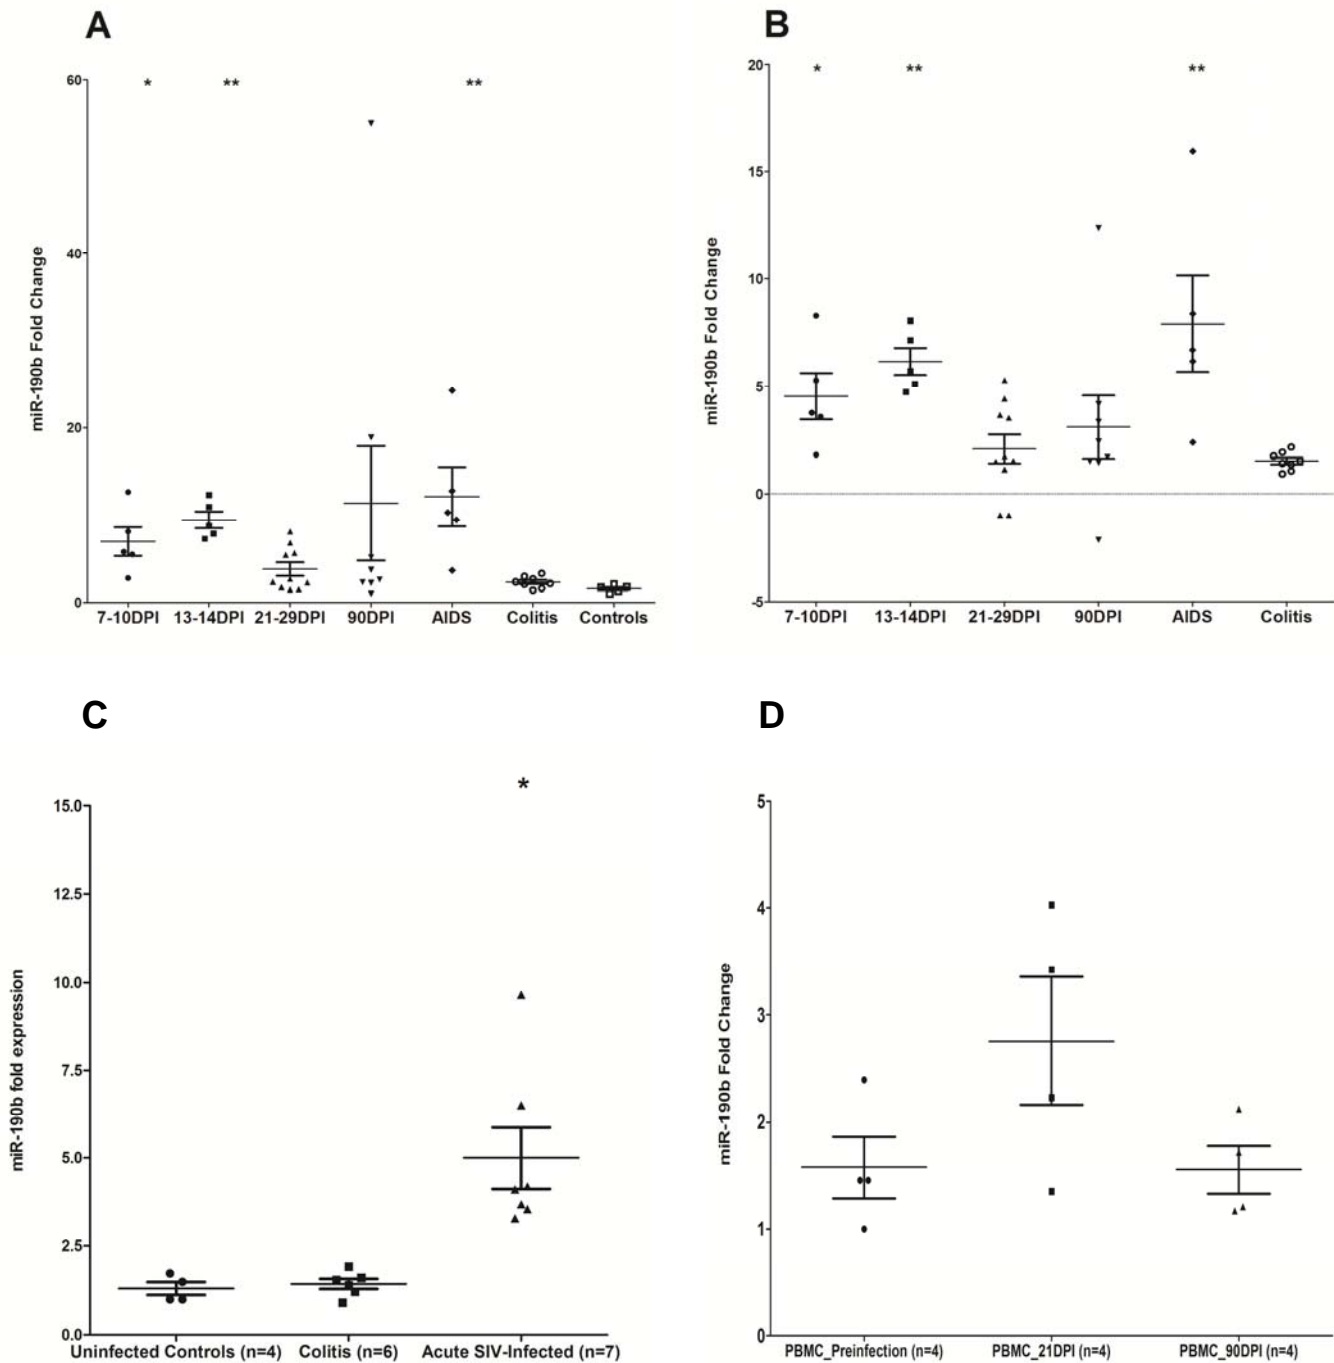

**Supplemental figure 2.** miR-190b fold change in the colon of SIV-infected macaques at 7-10, 13-14, 21-29, 90DPI and AIDS time points as well as uninfected macaques with and without colitis calculated relative to a single control macaque (**A**) versus average of all 5 control macaques (**B**). miR-190b expression is significantly elevated only in the colon of SIV-infected rhesus macaques (7-14DPI) and not in the newly harvested colon samples from 6 non-SIV-infected macaques with diarrhea and colitis (**C**). Data analysis using non-parametric Kruskal-Wallis test revealed differences among groups ( $p < 0.0001$ ). Single asterisk (\*) indicates statistical significance ( $p < 0.05$ ) compared to uninfected controls and non-SIV-infected macaques with diarrhea and colitis following Dunn's multiple groups comparison test. The error bars represent standard error of mean fold change within each group. miR-190b expression levels in PBMCs collected at preinfection, 21 and 90DPI time points from 4 macaques (HC36, HB31, HF27, HB48) (**D**).

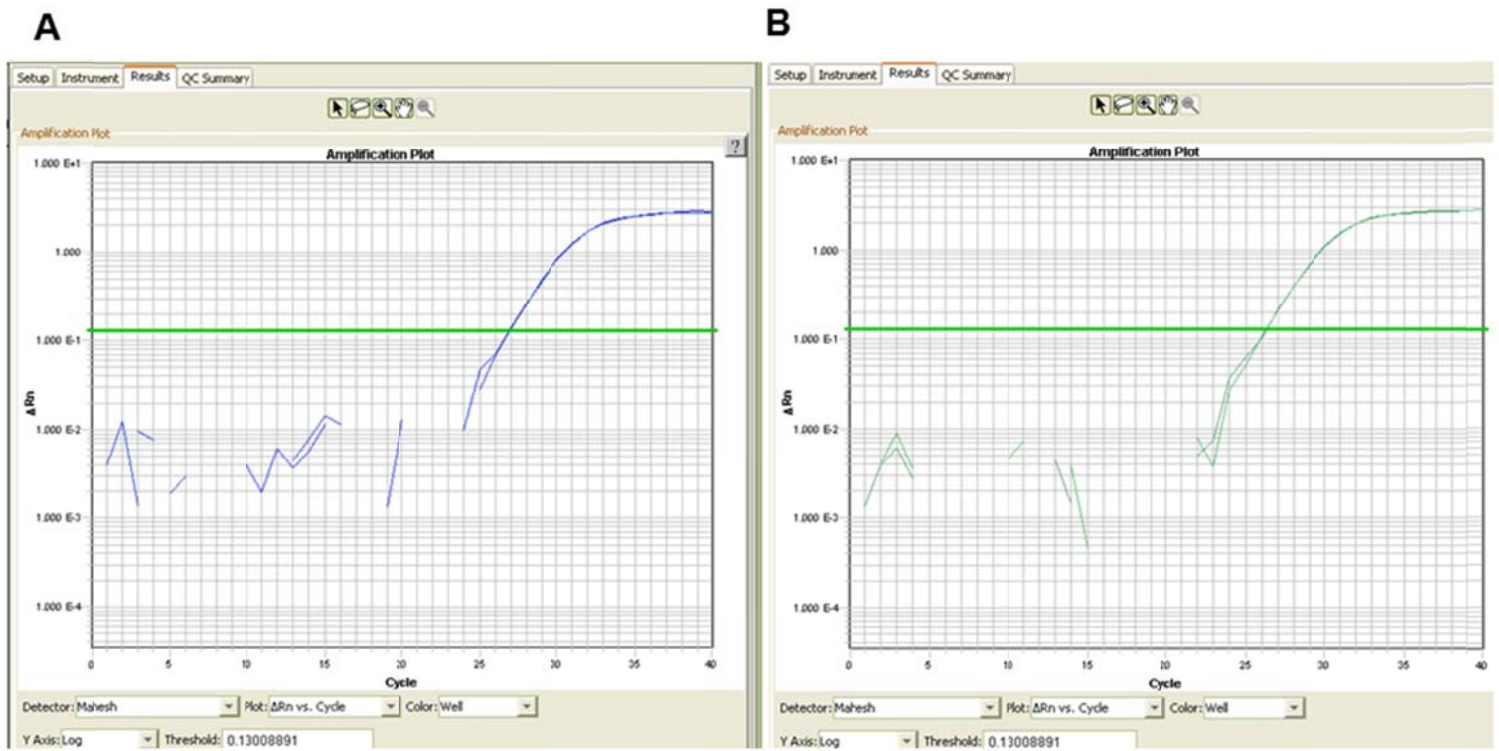

**Supplemental figure 3.** Amplification curves confirm expression of miR-190b in both uninfected viral target cells, namely, peripheral blood CD4<sup>+</sup> T cells (**A**) and in vitro cultured primary intestinal macrophages (**B**) using ~100 ng of total RNA .
